# Supplementary material for: Differential dynamics specify MeCP2 function at nucleosomes and methylated DNA
Source: PubMed Central journal article supplement — Nat Struct Mol Biol. 2024 Aug 20;31(11):1789–97. doi: 10.1038/s41594-024-01373-9 (PMC11564119; doi:10.1038/s41594-024-01373-9), 2024-08-20

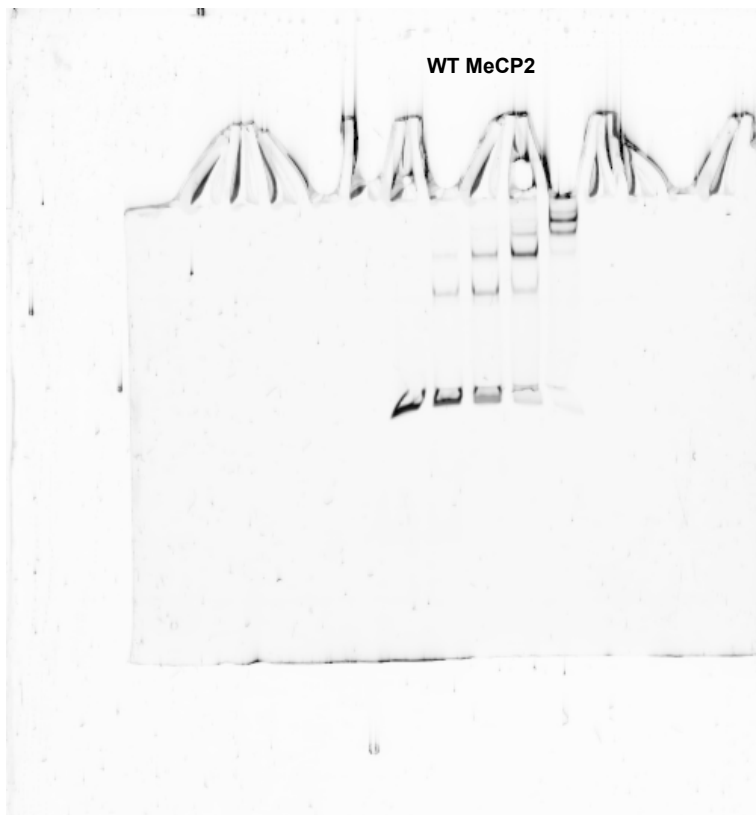

MeCP2 C339S, C413S

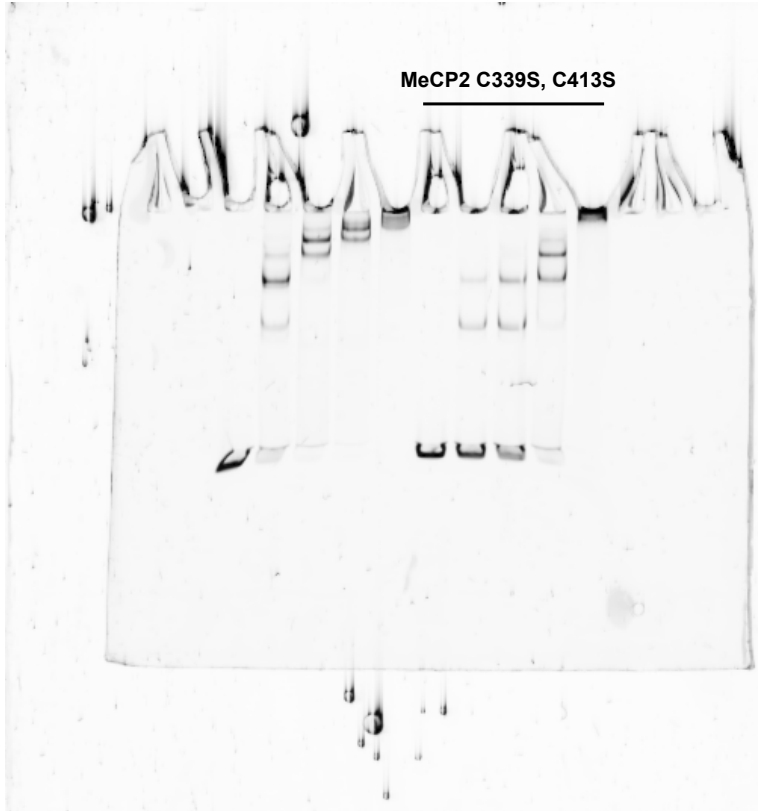

Cy3-MeCP2

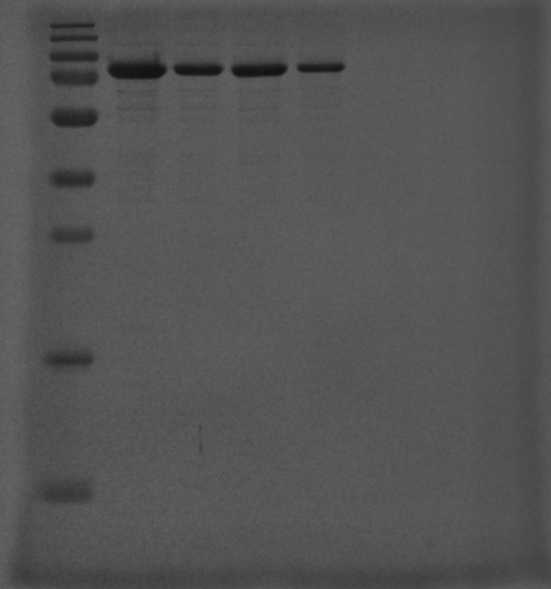

Cy3-MeCP2

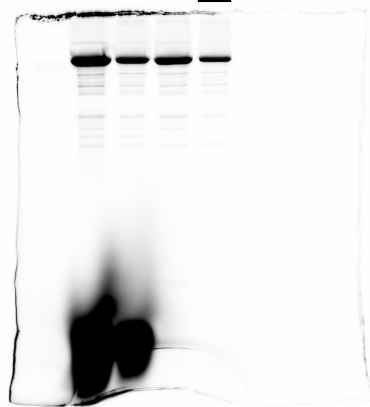



Cy3-MeCP2  
T158M

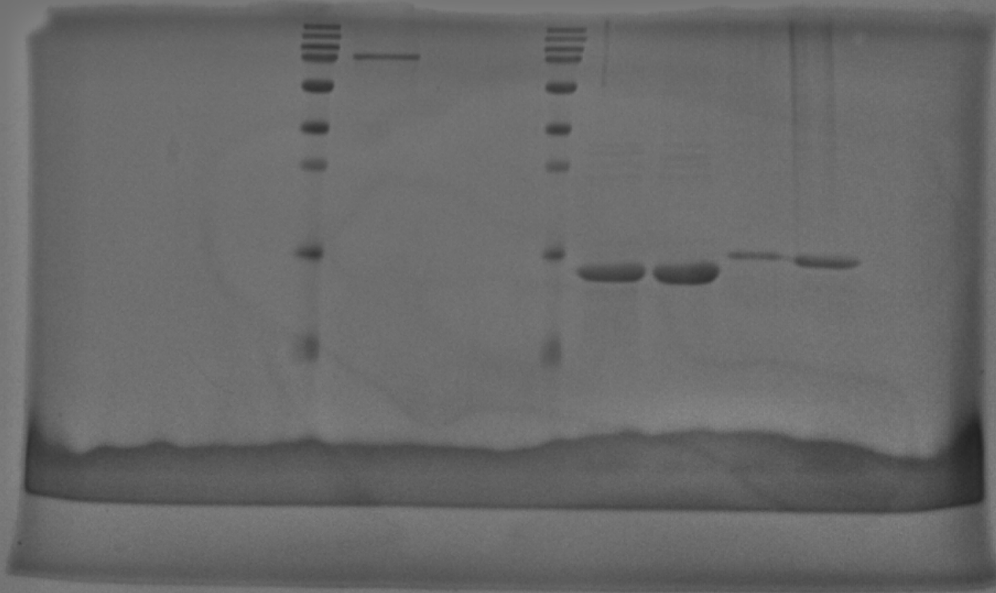

Cy3-MeCP2  
T158M

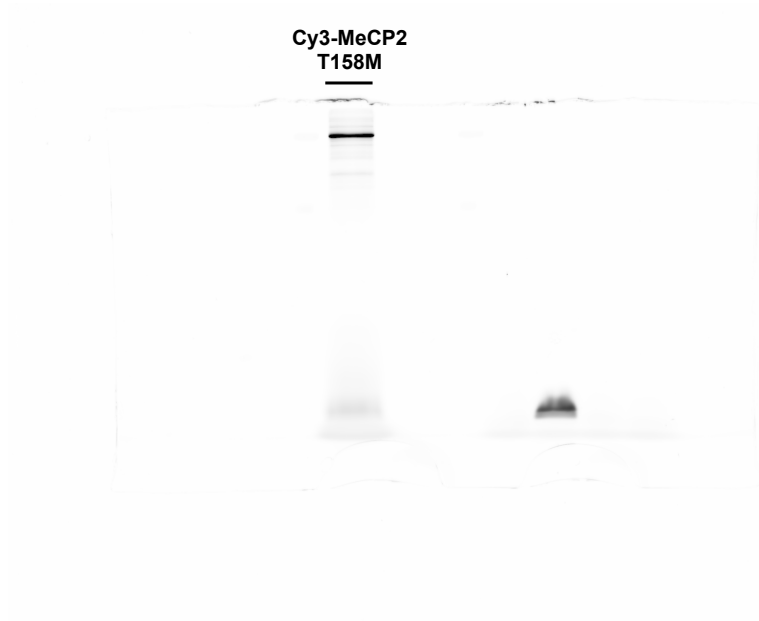

Cy3-MeCP2  
K210X    Cy3-MeCP2    Cy3-MeCP2  
                                                  
          R162X            P225R

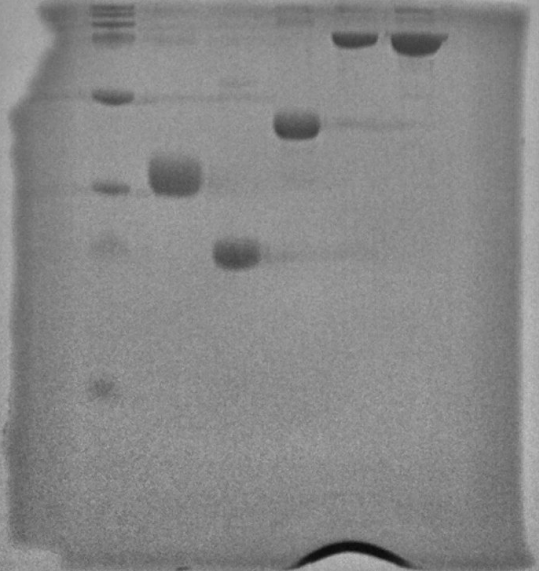

Cy3-MeCP2  
K210X  
Cy3-MeCP2  
R162X  
Cy3-MeCP2  
P225R

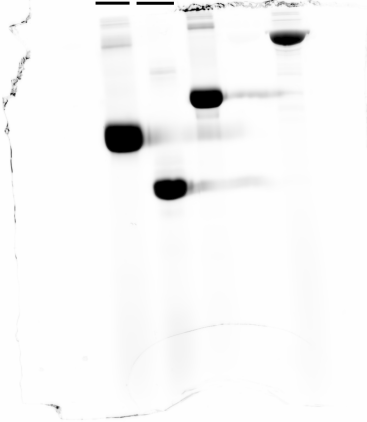



Cy3-MeCP2  
R270X

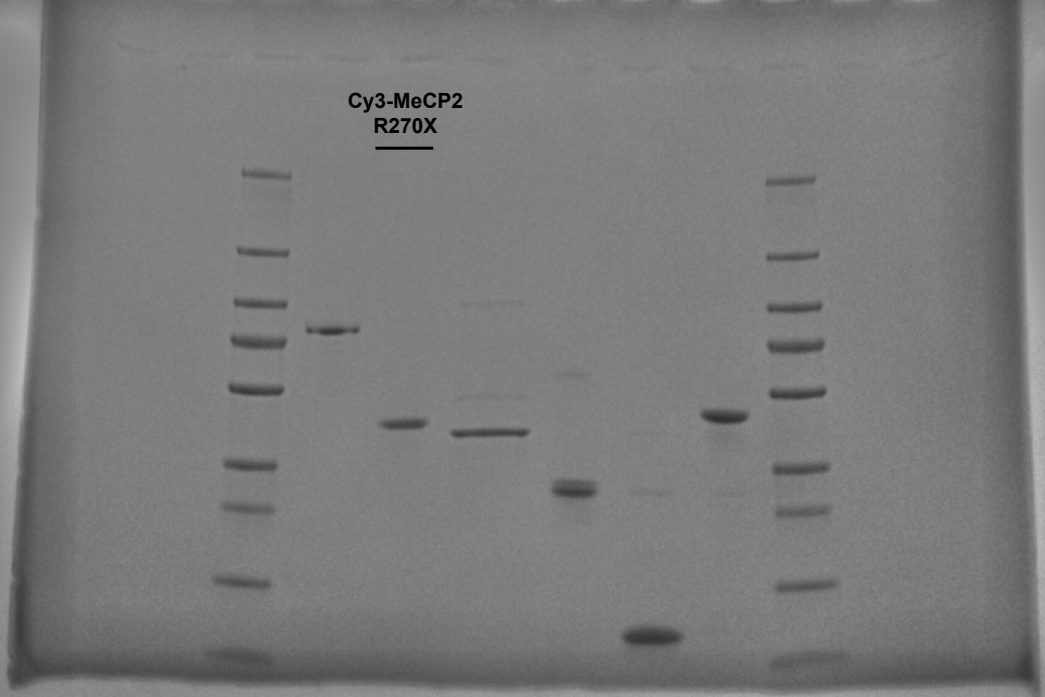

Cy3-MeCP2  
R270X

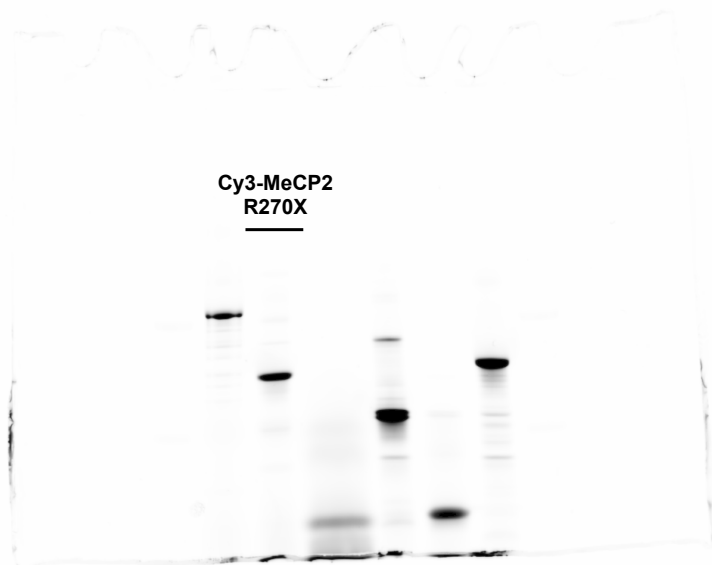

Supplement: 41594_2024_1373_MOESM10_ESM.pdf [file 41594_2024_1373_MOESM10_ESM.pdf]
