# Supplementary figures and images for: Differential dynamics specify MeCP2 function at nucleosomes and methylated DNA
Source: PubMed Central journal article supplement — Nat Struct Mol Biol. 2024 Aug 20;31(11):1789–97. doi: 10.1038/s41594-024-01373-9 (PMC11564119; doi:10.1038/s41594-024-01373-9), 2024-08-20

|               |   |   |
|---------------|---|---|
| <b>M.SssI</b> | - | + |
| <b>BstUI</b>  | + | + |

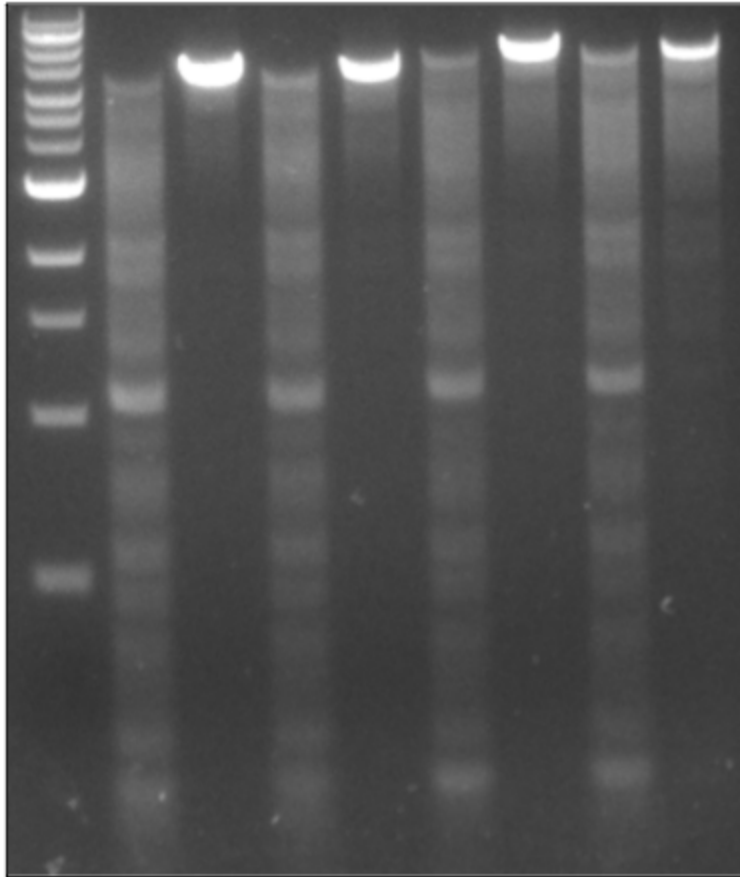

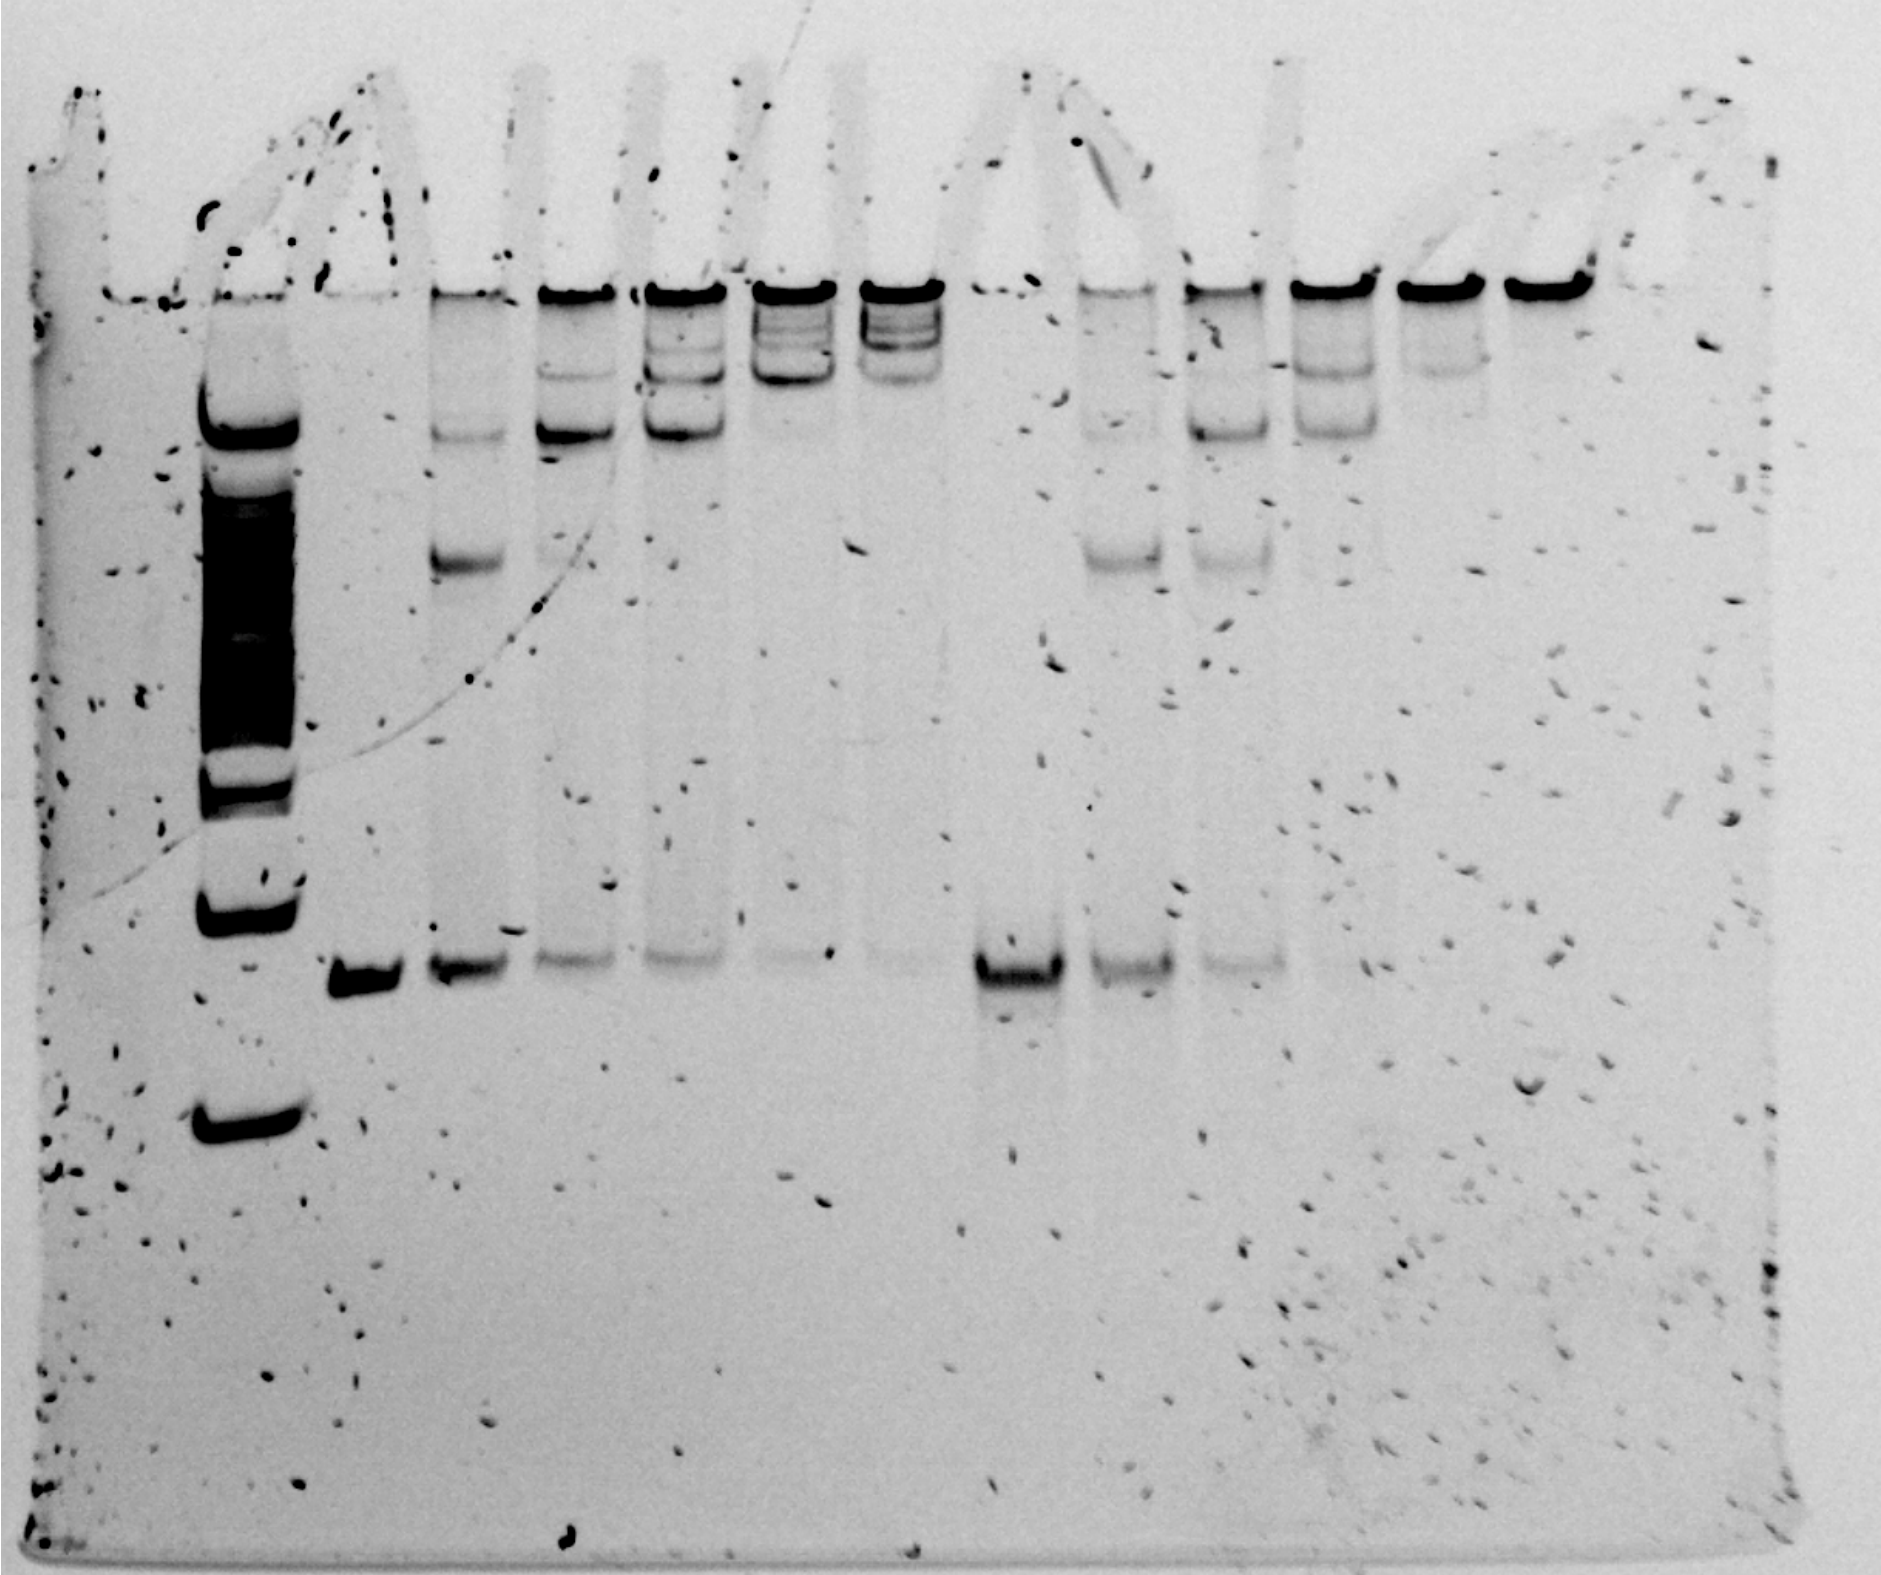

Supplement: 41594_2024_1373_MOESM12_ESM.pdf [file 41594_2024_1373_MOESM12_ESM.pdf]

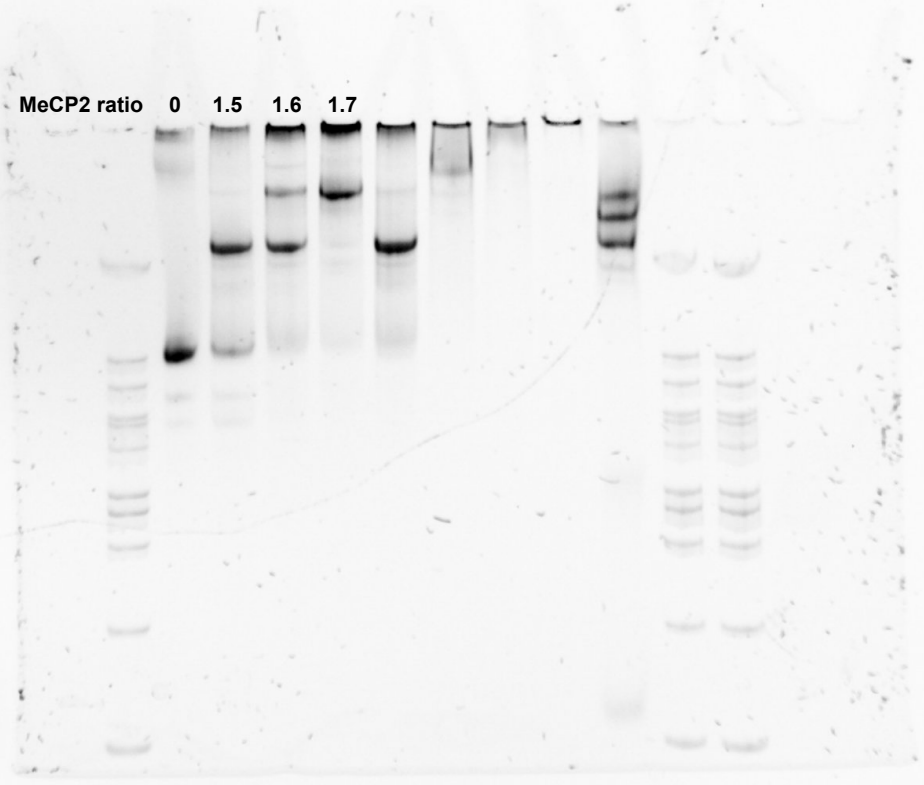

Supplement: 41594_2024_1373_MOESM15_ESM.pdf [file 41594_2024_1373_MOESM15_ESM.pdf]
